# Supplementary material for: Misincorporation by RNA polymerase is a major source of transcription pausing in vivo
Source: PubMed Central journal article supplement (PMC5388426; doi:10.1093/nar/gkw969), 2016-10-24
Supplement: gkw969_Supp.pdf [file gkw969_Supp.pdf]

## Supplementary Information for:

### Misincorporation by RNA polymerase is a major source of transcription pausing *in vivo*

Katherine James<sup>1</sup>, Pamela Gamba<sup>1</sup>, Simon J. Cockell<sup>2</sup>, Nikolay Zenkin<sup>1</sup>

<sup>1</sup>Centre for Bacterial Cell Biology, Institute for Cell and Molecular Bioscience, Newcastle University, Newcastle upon Tyne, NE1 7RU, UK.

<sup>2</sup>Bioinformatics Support Unit, Newcastle University, Newcastle upon Tyne NE1 7RU, UK.

#### Contents:

Figure S1: Quality control.

Figure S2: Alignment strategy.

Figure S3: Parameterization.

Table S1: Data sources.

Table S2: Accuracy of error rates.

Table S3: *Saccharomyces cerevisiae* alignment statistics.

Table S4: *Escherichia coli* alignment statistics.

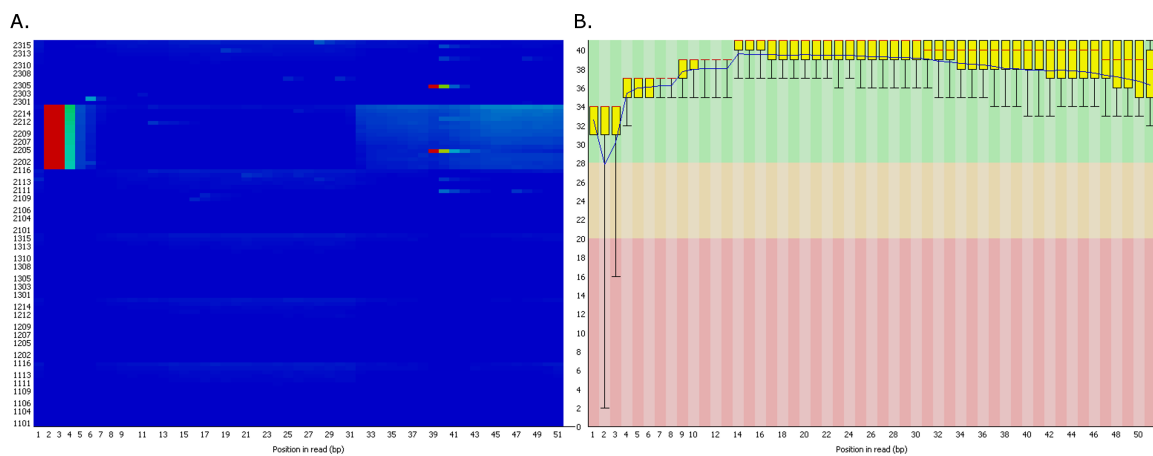

**Figure S1: Quality control.** Quality control of the *EcWT* dataset using FastQC revealed a systematic error, likely to be caused by a bubble in the flowcell, adjacent to the 3' position in a number of reads. These reads ( $n = 5590806$ , 15.59%) were omitted from the error rate calculations. No systematic errors were identified in the other datasets. A. Example of quality scores from each tile across all bases at each position in the *EcWT* reads. B. Example of quality values across all bases at each position in the *EcWT* reads.

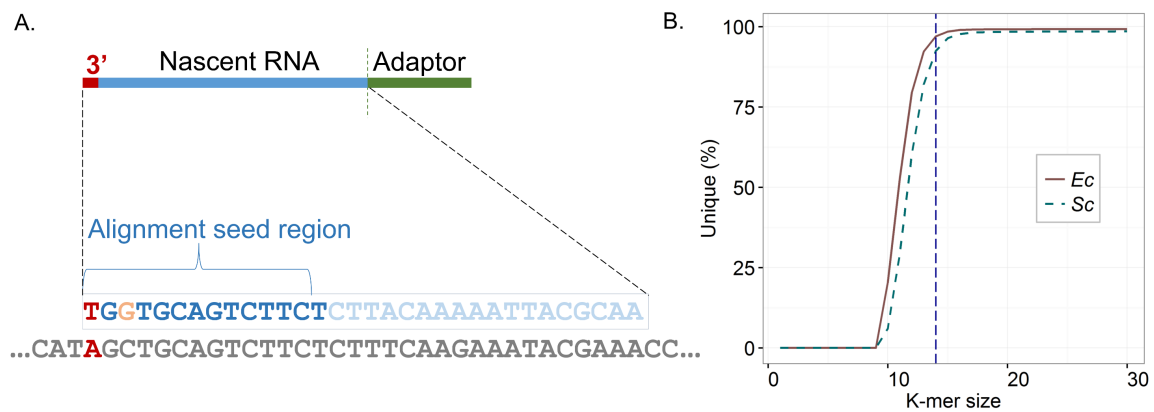

**Figure S2: Alignment strategy.** A. Alignment of the nascent RNA read was carried out following adaptor trimming allowing a maximum of two mismatches within the seed region. Error rates were calculated for all reads at each position. In this example an A>T mismatch, equivalent to A>U misincorporation in the nascent RNA, occurs at the 3' position, and a C>G mismatch at the -2 position. B. The seed region was chosen for alignment in order to minimize seed length, thus restricting mismatches to the region of the nascent 3', while ensuring seed uniqueness. A threshold of 14 (vertical blue dashed line) was chosen equivalent to > 90% uniqueness in all three genomes.

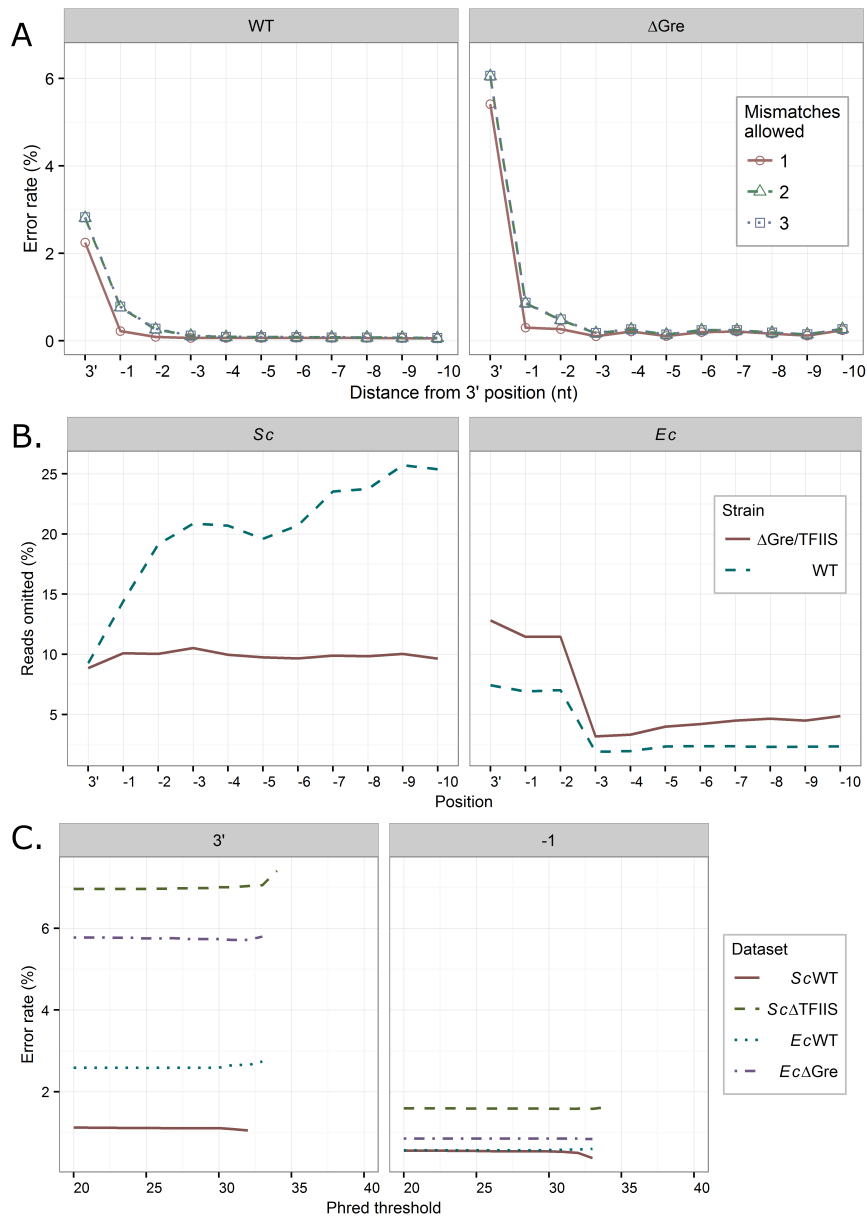

**Figure S3: Parameterisation.** Altering the number of mismatches allowed during alignment or the Phred quality threshold used for error rate calculation had little effect on the observed 3' error rates in all cases. A. The error rates for the *Ec*WT and *Ec* $\Delta$ Gre datasets allowing 1, 2 and 3 mismatches in the alignment. Reads were aligned to genomes using Bowtie using a seed region of 14 where only unique matches were reported. B. In order to reduce the effect of sequencing miscalls, a Phred threshold of 30, equivalent to a 99.9% base call accuracy rate, was applied at each position, and reads with reads falling below this level were omitted from error rate calculation for that position. C. The 3' error rates for the datasets as the Phred quality threshold is increased.

**Table S1: Data sources.** The wild type and deletion strain data included in this meta-analysis. All data were downloaded from the National Center for Biotechnology Informations Gene Expression Omnibus. The equivalent wild type RNA-seq data were also analyzed.

| <b>Species</b>                  | <b>Dataset</b>                                    | <b>Platform</b>             | <b>Accession</b> | <b>Ref</b> |
|---------------------------------|---------------------------------------------------|-----------------------------|------------------|------------|
| <i>Saccharomyces cerevisiae</i> | <i>Sc</i> WT<br><i>Sc</i> RNA<br><i>Sc</i> ΔTFIIS | Illumina Genome Analyser II | GSE25107         | [1]        |
| <i>Escherichia coli</i>         | <i>Ec</i> WT<br><i>Ec</i> RNA<br><i>Ec</i> ΔGre   | Illumina HiSeq 2000         | GSE56720         | [2]        |

**Table S2: Accuracy of error rates.** False positive error rates for the reverse transcriptase (RT), polymerase chain reaction (PCR) and sequencing (SEQ) stages of the NET-seq protocol. RT and PCR rates are calculated based on the manufacturers reported error rates while sequencing error rates are calculated based on a Phred quality threshold of 30. Accuracy of the error rates was then calculated as the percentage of all observed misincorporations that were not attributable to experimental false positives.

| Strain           | Observed error rate   |                       | Experimental error rate |                      |                      | Accuracy (%) |           |
|------------------|-----------------------|-----------------------|-------------------------|----------------------|----------------------|--------------|-----------|
|                  | 3                     | -1 to -10             | RT                      | PCR                  | SEQ                  | 3            | -1 to -10 |
| <i>Sc</i> WT     | 1.11x10 <sup>-2</sup> | 1.63x10 <sup>-3</sup> | 6.5x10 <sup>-5</sup>    | 4.4x10 <sup>-7</sup> | 1.0x10 <sup>-3</sup> | 90.99        | 38.65     |
| <i>Sc</i> ΔTFIIS | 7.00x10 <sup>-2</sup> | 4.33x10 <sup>-3</sup> |                         |                      |                      | 98.57        | 76.91     |
| <i>Sc</i> RNA    | 3.59x10 <sup>-3</sup> | 1.49x10 <sup>-3</sup> |                         |                      |                      | 72.14        | 32.89     |
| <i>Ec</i> WT     | 2.81x10 <sup>-2</sup> | 1.68x10 <sup>-3</sup> | 6.5x10 <sup>-5</sup>    | 4.4x10 <sup>-7</sup> | 1.0x10 <sup>-3</sup> | 96.44        | 40.48     |
| <i>Ec</i> ΔGre   | 5.73x10 <sup>-2</sup> | 2.28x10 <sup>-3</sup> |                         |                      |                      | 98.25        | 56.14     |
| <i>Ec</i> RNA    | 1.21x10 <sup>-2</sup> | 2.32x10 <sup>-3</sup> |                         |                      |                      | 91.74        | 56.90     |

**Table S3: *Saccharomyces cerevisiae* alignment statistics.** The total numbers of reads aligning to the genome for the *S. cerevisiae* datasets while allowing one, two and three mismatches (mm) in the seed region of the alignment. The number of reads aligning to rRNA are also displayed.

| <b>Dataset</b>           | <b>Reads</b> | <b>tRNA</b> | <b>snoRNA</b> | <b>rRNA</b> | <b># mm</b> | <b>Aligned</b> |
|--------------------------|--------------|-------------|---------------|-------------|-------------|----------------|
| <i>Sc</i> WT             | 63709986     | 594958      | 419395        | 30469062    | 1           | 18007915       |
|                          |              | 0.93%       | 0.66%         | 47.82%      |             | 28.27%         |
|                          |              |             |               |             | 2           | 18134305       |
|                          |              |             |               |             |             | 28.46%         |
|                          |              |             |               |             | 3           | 18134233       |
|                          |              |             |               |             |             | 28.46%         |
| <i>Sc</i> $\Delta$ TFIIS | 50177404     | 372206      | 667670        | 21272496    | 1           | 11183635       |
|                          |              | 0.74%       | 1.33%         | 42.39%      |             | 22.29%         |
|                          |              |             |               |             | 2           | 11401566       |
|                          |              |             |               |             |             | 22.72%         |
|                          |              |             |               |             | 3           | 11402017       |
|                          |              |             |               |             |             | 22.72%         |
| <i>Sc</i> rRNA           | 50898888     | 93999       | 18963         | 27160142    | 1           | 13399322       |
|                          |              | 0.18%       | 0.04%         | 53.36%      |             | 26.33%         |
|                          |              |             |               |             | 2           | 13471539       |
|                          |              |             |               |             |             | 26.47%         |
|                          |              |             |               |             | 3           | 13471624       |
|                          |              |             |               |             |             | 26.47%         |

**Table S4: *Escherichia coli* alignment statistics.** The total numbers of reads aligning to the genome for the *E. coli* datasets while allowing one, two and three mismatches (mm) in the seed region of the alignment.

| <b>Dataset</b> | <b># mm</b> | <b>Total reads</b> | <b>Aligned</b> | <b>Percentage</b> |
|----------------|-------------|--------------------|----------------|-------------------|
| <i>Ec</i> WT   | 1           | 66320440           | 35415011       | 53.40%            |
|                | 2           |                    | 35867134       | 54.08%            |
|                | 3           |                    | 35892771       | 54.12%            |
| <i>Ec</i> ΔGre | 1           | 42929547           | 22163387       | 51.63%            |
|                | 2           |                    | 22371035       | 52.11%            |
|                | 3           |                    | 22373984       | 52.12%            |
| <i>Ec</i> RNA  | 1           | 38645886           | 5716198        | 14.79%            |
|                | 2           |                    | 5752800        | 14.89%            |
|                | 3           |                    | 5753490        | 14.89%            |



## References

- [1] Churchman, L.S. & Weissman, J.S. Nascent transcript sequencing visualizes transcription at nucleotide resolution. *Nature*, 2011, 469, 368-373. doi:10.1038/nature09652.
- [2] Larson, M.H., Mooney, R.A., Peters, J.M., Windgassen, T., Nayak, D., Gross, C.A., Block, S.M., Greenleaf, W.J., Landick, R. & Weissman, J.S. A pause sequence enriched at translation start sites drives transcription dynamics *in vivo* *Science*, 2014, 344, 1042-1047. doi:10.1126/science.1251871.
